# Supplementary material
Source: Springer Nature journal article supplement (https://www.springermedizin.de/resource/supplementary/12885_2014_5198_MOESM8_ESM.pdf/9468570)
Supplement: MOESM8 [file 9468570]

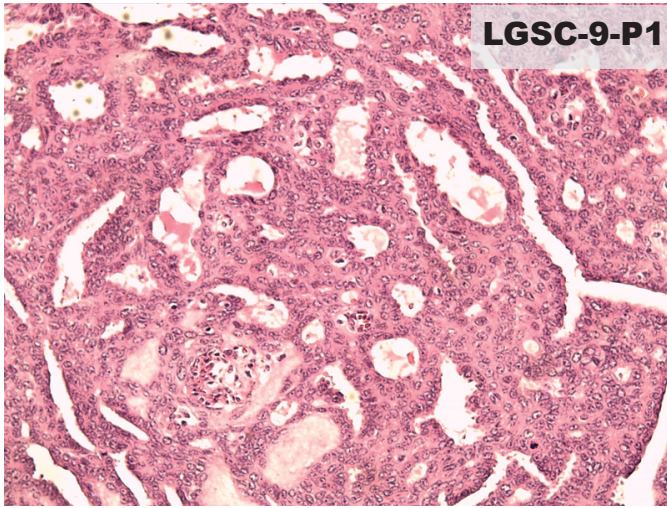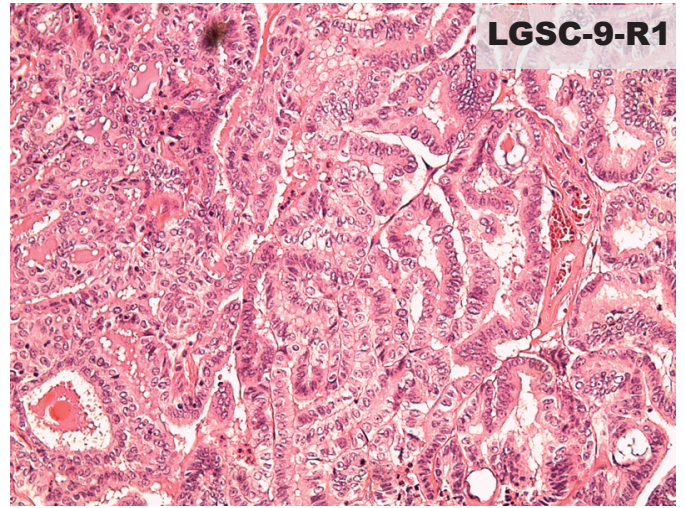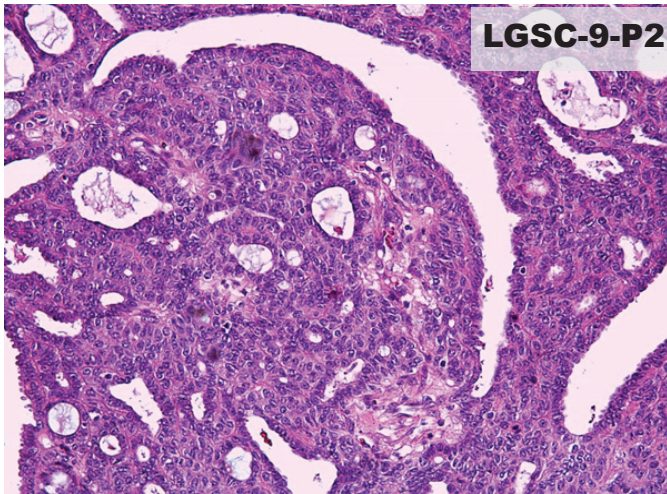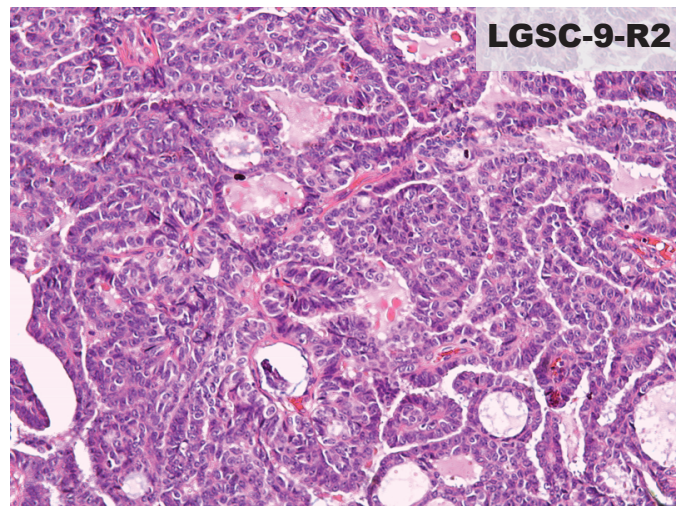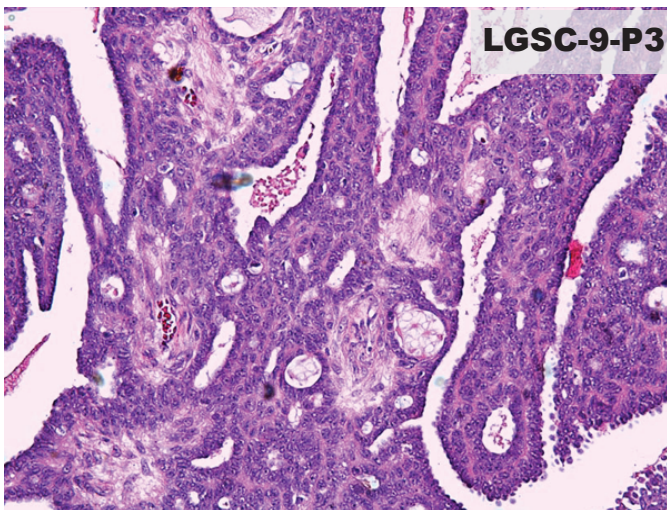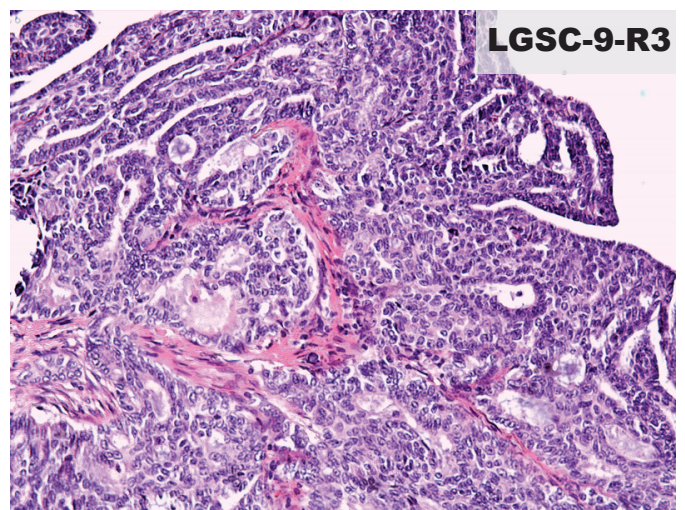

**Additional File 10. LGSC-9 Case Images.**
